# Supplementary material
Source: Springer Nature journal article supplement (https://www.springerprofessional.de/resource/supplementary/13638_2014_908_MOESM4_ESM.pdf/11899194)

Difference of Lifetime for all the 1000 Groups

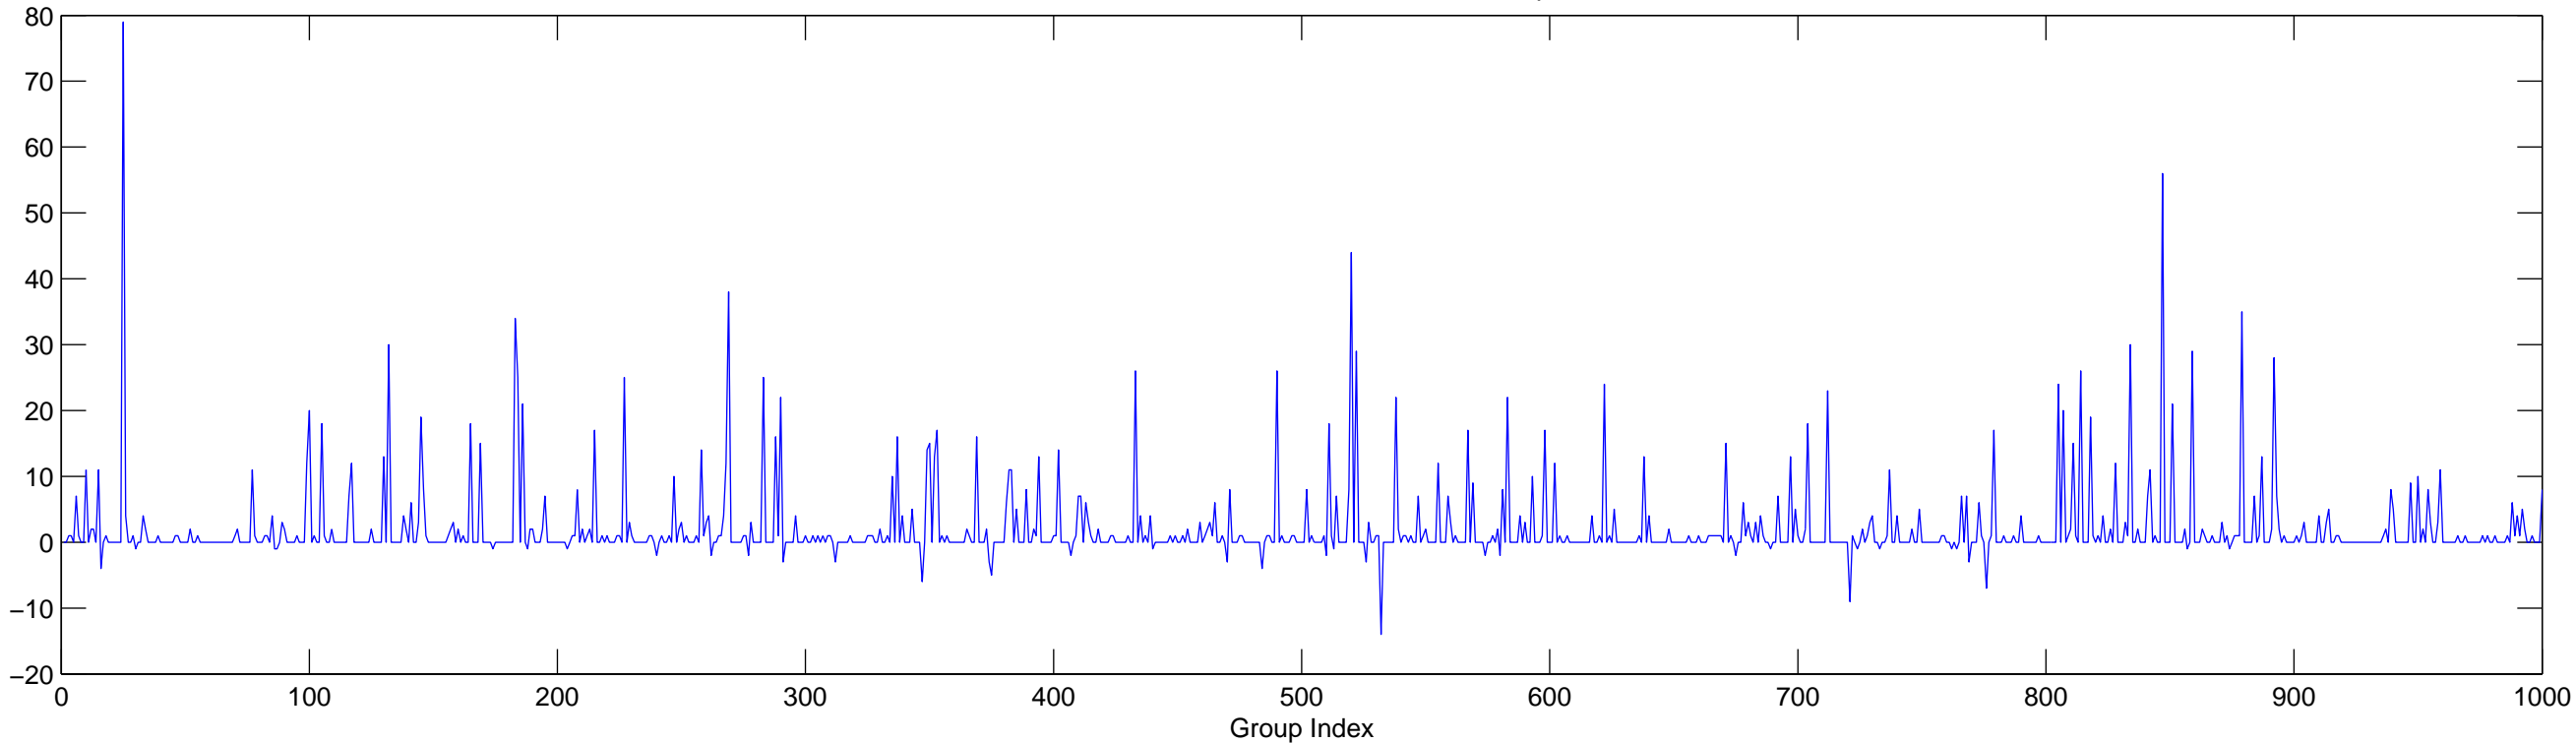

Supplement: MOESM4 [file 11899194]
